# Supplementary material for: Demographic, ecological, and physiological responses of ringed seals to an abrupt decline in sea ice availability
Source: PeerJ. 2017 Feb 2;5:e2957. doi: 10.7717/peerj.2957 (PMC5292026; doi:10.7717/peerj.2957)
Supplement: Supplemental Information 2 — Year, sample size, mean radio-immune assay cortisol (ng/g), standard deviation, standard error. [file peerj-05-2957-s002.csv]

year	cortisol	daysopen	AO	ENSO	NAO
2003	0.023019109	177	0.2135775	0.9	-0.053333333
2003	0.0807674	177	0.2135775	0.9	-0.053333333
2003	0.040401953	177	0.2135775	0.9	-0.053333333
2003	0.048122828	177	0.2135775	0.9	-0.053333333
2003	0.033733737	177	0.2135775	0.9	-0.053333333
2003	0.068442677	177	0.2135775	0.9	-0.053333333
2003	0.053289925	177	0.2135775	0.9	-0.053333333
2003	0.181013107	177	0.2135775	0.9	-0.053333333
2003	0.0098587	177	0.2135775	0.9	-0.053333333
2003	0.025359167	177	0.2135775	0.9	-0.053333333
2003	0.011171995	177	0.2135775	0.9	-0.053333333
2003	0.050550784	177	0.2135775	0.9	-0.053333333
2003	0.007835475	177	0.2135775	0.9	-0.053333333
2003	0.448680198	177	0.2135775	0.9	-0.053333333
2003	0.087707039	177	0.2135775	0.9	-0.053333333
2003	0.023724169	177	0.2135775	0.9	-0.053333333
2003	0.003031931	177	0.2135775	0.9	-0.053333333
2003	0.140769563	177	0.2135775	0.9	-0.053333333
2003	0.115009485	177	0.2135775	0.9	-0.053333333
2003	0.083827059	177	0.2135775	0.9	-0.053333333
2003	0.04642801	177	0.2135775	0.9	-0.053333333
2003	0.071845272	177	0.2135775	0.9	-0.053333333
2003	0.418186082	177	0.2135775	0.9	-0.053333333
2003	0.031832718	177	0.2135775	0.9	-0.053333333
2003	0.028438886	177	0.2135775	0.9	-0.053333333
2003	0.038066699	177	0.2135775	0.9	-0.053333333
2003	0.034377475	177	0.2135775	0.9	-0.053333333
2003	0.100494563	177	0.2135775	0.9	-0.053333333
2003	0.045937985	177	0.2135775	0.9	-0.053333333
2003	0.036098908	177	0.2135775	0.9	-0.053333333
2003	0.30964899	177	0.2135775	0.9	-0.053333333
2003	0.019054377	177	0.2135775	0.9	-0.053333333
2003	0.01264825	177	0.2135775	0.9	-0.053333333
2003	0.038397854	177	0.2135775	0.9	-0.053333333
2003	0.124000297	177	0.2135775	0.9	-0.053333333
2003	0.029518886	177	0.2135775	0.9	-0.053333333
2003	0.013083591	177	0.2135775	0.9	-0.053333333
2003	0	177	0.2135775	0.9	-0.053333333
2003	0.002042267	177	0.2135775	0.9	-0.053333333
2003	0.001696605	177	0.2135775	0.9	-0.053333333
2003	0	177	0.2135775	0.9	-0.053333333
2003	0.028002624	177	0.2135775	0.9	-0.053333333
2003	0.005138297	177	0.2135775	0.9	-0.053333333
2003	0.026934015	177	0.2135775	0.9	-0.053333333
2003	0.03871485	177	0.2135775	0.9	-0.053333333
2003	0.066339307	177	0.2135775	0.9	-0.053333333
2003	0	177	0.2135775	0.9	-0.053333333
2003	0.024175176	177	0.2135775	0.9	-0.053333333
2003	0.063563	177	0.2135775	0.9	-0.053333333
2003	0	177	0.2135775	0.9	-0.053333333
2003	0.22066825	177	0.2135775	0.9	-0.053333333
2003	0	177	0.2135775	0.9	-0.053333333
2003	0.069269035	177	0.2135775	0.9	-0.053333333
2003	0.400601961	177	0.2135775	0.9	-0.053333333
2003	0.029166	177	0.2135775	0.9	-0.053333333
2003	0.018332816	177	0.2135775	0.9	-0.053333333
2003	0	177	0.2135775	0.9	-0.053333333
2003	0.031631582	177	0.2135775	0.9	-0.053333333
2003	0.03438495	177	0.2135775	0.9	-0.053333333
2003	0.047047551	177	0.2135775	0.9	-0.053333333
2003	0.022321028	177	0.2135775	0.9	-0.053333333
2003	0	177	0.2135775	0.9	-0.053333333
2003	0.157066742	177	0.2135775	0.9	-0.053333333
2003	0.090540916	177	0.2135775	0.9	-0.053333333
2003	0.27127475	177	0.2135775	0.9	-0.053333333
2003	0.164603886	177	0.2135775	0.9	-0.053333333
2003	0.030877087	177	0.2135775	0.9	-0.053333333
2003	0.023990572	177	0.2135775	0.9	-0.053333333
2003	0.088459665	177	0.2135775	0.9	-0.053333333
2003	0.032728848	177	0.2135775	0.9	-0.053333333
2003	0.072835194	177	0.2135775	0.9	-0.053333333
2003	0.029268687	177	0.2135775	0.9	-0.053333333
2004	0	161	-0.416535	0.3	0.07
2004	0	161	-0.416535	0.3	0.07
2004	0.12178755	161	-0.416535	0.3	0.07
2004	0.02891315	161	-0.416535	0.3	0.07
2004	0.26910025	161	-0.416535	0.3	0.07
2004	0	161	-0.416535	0.3	0.07
2004	0.010698327	161	-0.416535	0.3	0.07
2004	0.056358925	161	-0.416535	0.3	0.07
2004	0	161	-0.416535	0.3	0.07
2004	0.223663699	161	-0.416535	0.3	0.07
2004	0.100411263	161	-0.416535	0.3	0.07
2004	0.01905798	161	-0.416535	0.3	0.07
2004	0.015308137	161	-0.416535	0.3	0.07
2004	0.088566912	161	-0.416535	0.3	0.07
2004	0.252273529	161	-0.416535	0.3	0.07
2004	0	161	-0.416535	0.3	0.07
2004	0.126702304	161	-0.416535	0.3	0.07
2004	0.182762828	161	-0.416535	0.3	0.07
2004	0.504689394	161	-0.416535	0.3	0.07
2004	0.10095149	161	-0.416535	0.3	0.07
2004	0.047243586	161	-0.416535	0.3	0.07
2004	0.0607699	161	-0.416535	0.3	0.07
2004	0.162658308	161	-0.416535	0.3	0.07
2004	0.07690801	161	-0.416535	0.3	0.07
2004	0.149476959	161	-0.416535	0.3	0.07
2004	0.08700654	161	-0.416535	0.3	0.07
2004	0.093302036	161	-0.416535	0.3	0.07
2004	0.092756944	161	-0.416535	0.3	0.07
2004	0.221610383	161	-0.416535	0.3	0.07
2004	0.072844575	161	-0.416535	0.3	0.07
2004	0.117803425	161	-0.416535	0.3	0.07
2004	0.024393691	161	-0.416535	0.3	0.07
2005	0.029376005	192	-1.0915575	0.6	0.89
2005	0.027842772	192	-1.0915575	0.6	0.89
2005	0.225011	192	-1.0915575	0.6	0.89
2005	0.136402612	192	-1.0915575	0.6	0.89
2005	0.203846	192	-1.0915575	0.6	0.89
2005	0.073705152	192	-1.0915575	0.6	0.89
2005	0.038021667	192	-1.0915575	0.6	0.89
2005	0.009158641	192	-1.0915575	0.6	0.89
2005	0.004783875	192	-1.0915575	0.6	0.89
2005	0.069456	192	-1.0915575	0.6	0.89
2005	0.01551126	192	-1.0915575	0.6	0.89
2005	0.001412633	192	-1.0915575	0.6	0.89
2005	0.09812885	192	-1.0915575	0.6	0.89
2005	0.093470125	192	-1.0915575	0.6	0.89
2005	0.11890805	192	-1.0915575	0.6	0.89
2005	0.273400971	192	-1.0915575	0.6	0.89
2005	0.069112475	192	-1.0915575	0.6	0.89
2005	0.057853675	192	-1.0915575	0.6	0.89
2005	0.02582799	192	-1.0915575	0.6	0.89
2005	0.027859949	192	-1.0915575	0.6	0.89
2005	0.002735889	192	-1.0915575	0.6	0.89
2005	0.028346225	192	-1.0915575	0.6	0.89
2005	0.098276875	192	-1.0915575	0.6	0.89
2005	0.039561064	192	-1.0915575	0.6	0.89
2005	0	192	-1.0915575	0.6	0.89
2005	0.038024005	192	-1.0915575	0.6	0.89
2005	0.00775821	192	-1.0915575	0.6	0.89
2005	0.079239672	192	-1.0915575	0.6	0.89
2005	0.673231	192	-1.0915575	0.6	0.89
2005	0.144343045	192	-1.0915575	0.6	0.89
2005	0.06371518	192	-1.0915575	0.6	0.89
2005	0.165942448	192	-1.0915575	0.6	0.89
2005	0.02829616	192	-1.0915575	0.6	0.89
2005	0.045522401	192	-1.0915575	0.6	0.89
2005	0.202540583	192	-1.0915575	0.6	0.89
2005	0.139425121	192	-1.0915575	0.6	0.89
2005	0.002891112	192	-1.0915575	0.6	0.89
2005	0.226704265	192	-1.0915575	0.6	0.89
2005	0.022737013	192	-1.0915575	0.6	0.89
2005	0.128564716	192	-1.0915575	0.6	0.89
2005	0.13034665	192	-1.0915575	0.6	0.89
2005	0.029961684	192	-1.0915575	0.6	0.89
2005	0.212674158	192	-1.0915575	0.6	0.89
2005	0.069435693	192	-1.0915575	0.6	0.89
2005	0.076238812	192	-1.0915575	0.6	0.89
2005	0.25090975	192	-1.0915575	0.6	0.89
2005	0.117472526	192	-1.0915575	0.6	0.89
2005	0.016237661	192	-1.0915575	0.6	0.89
2005	0.065849725	192	-1.0915575	0.6	0.89
2005	0	192	-1.0915575	0.6	0.89
2005	0	192	-1.0915575	0.6	0.89
2005	0.229744621	192	-1.0915575	0.6	0.89
2005	0.28004898	192	-1.0915575	0.6	0.89
2005	0.157019268	192	-1.0915575	0.6	0.89
2005	0.026385916	192	-1.0915575	0.6	0.89
2005	0.022650891	192	-1.0915575	0.6	0.89
2005	0.061214233	192	-1.0915575	0.6	0.89
2005	0	192	-1.0915575	0.6	0.89
2005	0.015798056	192	-1.0915575	0.6	0.89
2005	0.069075125	192	-1.0915575	0.6	0.89
2005	0.038925077	192	-1.0915575	0.6	0.89
2005	0	192	-1.0915575	0.6	0.89
2005	0.119125425	192	-1.0915575	0.6	0.89
2005	0.132223391	192	-1.0915575	0.6	0.89
2005	0.089933283	192	-1.0915575	0.6	0.89
2005	0.036249332	192	-1.0915575	0.6	0.89
2005	0.710605882	192	-1.0915575	0.6	0.89
2005	0.057427549	192	-1.0915575	0.6	0.89
2005	0.15063191	192	-1.0915575	0.6	0.89
2005	0.175341733	192	-1.0915575	0.6	0.89
2005	0.048364343	192	-1.0915575	0.6	0.89
2005	0	192	-1.0915575	0.6	0.89
2005	0.021392648	192	-1.0915575	0.6	0.89
2005	0	192	-1.0915575	0.6	0.89
2005	0	192	-1.0915575	0.6	0.89
2005	0.202196939	192	-1.0915575	0.6	0.89
2005	0.013735933	192	-1.0915575	0.6	0.89
2005	0.0543825	192	-1.0915575	0.6	0.89
2005	0.144298676	192	-1.0915575	0.6	0.89
2005	0.059136068	192	-1.0915575	0.6	0.89
2005	0.056995	192	-1.0915575	0.6	0.89
2005	0.010818907	192	-1.0915575	0.6	0.89
2005	0.121145294	192	-1.0915575	0.6	0.89
2005	0.018350862	192	-1.0915575	0.6	0.89
2005	0.19143125	192	-1.0915575	0.6	0.89
2005	0.033706288	192	-1.0915575	0.6	0.89
2005	0.195392351	192	-1.0915575	0.6	0.89
2005	0.016973424	192	-1.0915575	0.6	0.89
2005	0.114969217	192	-1.0915575	0.6	0.89
2005	0.05494047	192	-1.0915575	0.6	0.89
2005	0.12056354	192	-1.0915575	0.6	0.89
2005	0.02931175	192	-1.0915575	0.6	0.89
2005	0.058898762	192	-1.0915575	0.6	0.89
2005	0.14932375	192	-1.0915575	0.6	0.89
2005	0.09313405	192	-1.0915575	0.6	0.89
2005	0.089126919	192	-1.0915575	0.6	0.89
2005	0.096130051	192	-1.0915575	0.6	0.89
2005	0.070166634	192	-1.0915575	0.6	0.89
2005	0.27792825	192	-1.0915575	0.6	0.89
2005	0.018279927	192	-1.0915575	0.6	0.89
2005	0.081215049	192	-1.0915575	0.6	0.89
2005	0.08283935	192	-1.0915575	0.6	0.89
2005	0.0996575	192	-1.0915575	0.6	0.89
2005	0.090857425	192	-1.0915575	0.6	0.89
2005	0.015333224	192	-1.0915575	0.6	0.89
2005	0.0819467	192	-1.0915575	0.6	0.89
2005	0.352131373	192	-1.0915575	0.6	0.89
2005	0.0826454	192	-1.0915575	0.6	0.89
2005	0.145169337	192	-1.0915575	0.6	0.89
2005	0.06664085	192	-1.0915575	0.6	0.89
2005	0.214711414	192	-1.0915575	0.6	0.89
2005	0.160199668	192	-1.0915575	0.6	0.89
2005	0.0800438	192	-1.0915575	0.6	0.89
2005	0.118707245	192	-1.0915575	0.6	0.89
2005	0.154908575	192	-1.0915575	0.6	0.89
2005	0.061067377	192	-1.0915575	0.6	0.89
2005	0.096187577	192	-1.0915575	0.6	0.89
2005	0.03557875	192	-1.0915575	0.6	0.89
2005	0.010778861	192	-1.0915575	0.6	0.89
2005	0.042923283	192	-1.0915575	0.6	0.89
2006	0.034887549	210	0.087915	-0.7	0.104836667
2006	0.044348138	210	0.087915	-0.7	0.104836667
2006	0.135243428	210	0.087915	-0.7	0.104836667
2006	0.049448	210	0.087915	-0.7	0.104836667
2006	0	210	0.087915	-0.7	0.104836667
2006	0.10670154	210	0.087915	-0.7	0.104836667
2006	0.069868801	210	0.087915	-0.7	0.104836667
2006	0.277222772	210	0.087915	-0.7	0.104836667
2006	0.010012757	210	0.087915	-0.7	0.104836667
2006	0.069219949	210	0.087915	-0.7	0.104836667
2006	0.028590147	210	0.087915	-0.7	0.104836667
2006	0	210	0.087915	-0.7	0.104836667
2006	0.029940172	210	0.087915	-0.7	0.104836667
2006	0.036051626	210	0.087915	-0.7	0.104836667
2006	0.23875745	210	0.087915	-0.7	0.104836667
2006	0.072998725	210	0.087915	-0.7	0.104836667
2006	1.463372475	210	0.087915	-0.7	0.104836667
2006	0.240129227	210	0.087915	-0.7	0.104836667
2006	0	210	0.087915	-0.7	0.104836667
2006	0.16488773	210	0.087915	-0.7	0.104836667
2006	0.032304381	210	0.087915	-0.7	0.104836667
2006	0	210	0.087915	-0.7	0.104836667
2006	0.144744158	210	0.087915	-0.7	0.104836667
2006	0.053716925	210	0.087915	-0.7	0.104836667
2006	0.0295051	210	0.087915	-0.7	0.104836667
2006	0.155239005	210	0.087915	-0.7	0.104836667
2006	0.215592727	210	0.087915	-0.7	0.104836667
2006	1.201074235	210	0.087915	-0.7	0.104836667
2006	0.007507054	210	0.087915	-0.7	0.104836667
2006	0.100219775	210	0.087915	-0.7	0.104836667
2006	0.115234485	210	0.087915	-0.7	0.104836667
2006	0	210	0.087915	-0.7	0.104836667
2006	0	210	0.087915	-0.7	0.104836667
2006	0.003686415	210	0.087915	-0.7	0.104836667
2006	0.024137913	210	0.087915	-0.7	0.104836667
2006	0.193977598	210	0.087915	-0.7	0.104836667
2006	0.109551708	210	0.087915	-0.7	0.104836667
2006	0.164837673	210	0.087915	-0.7	0.104836667
2006	0.048958416	210	0.087915	-0.7	0.104836667
2006	0.050323214	210	0.087915	-0.7	0.104836667
2007	0.044794314	172	0.6825325	0.7	0.36307
2007	0.278814851	172	0.6825325	0.7	0.36307
2007	0.44380475	172	0.6825325	0.7	0.36307
2007	0.13128392	172	0.6825325	0.7	0.36307
2007	0.204506312	172	0.6825325	0.7	0.36307
2007	0.255002351	172	0.6825325	0.7	0.36307
2007	0.289570328	172	0.6825325	0.7	0.36307
2007	0.012440123	172	0.6825325	0.7	0.36307
2007	0.104198911	172	0.6825325	0.7	0.36307
2007	0.209682449	172	0.6825325	0.7	0.36307
2007	0.464370455	172	0.6825325	0.7	0.36307
2007	0.142520074	172	0.6825325	0.7	0.36307
2007	0	172	0.6825325	0.7	0.36307
2007	0.110125455	172	0.6825325	0.7	0.36307
2007	0.033116188	172	0.6825325	0.7	0.36307
2007	0.701881683	172	0.6825325	0.7	0.36307
2007	0.132815194	172	0.6825325	0.7	0.36307
2007	2.664717822	172	0.6825325	0.7	0.36307
2007	0.197650179	172	0.6825325	0.7	0.36307
2007	0.691998232	172	0.6825325	0.7	0.36307
2007	0.139368825	172	0.6825325	0.7	0.36307
2007	0.22279977	172	0.6825325	0.7	0.36307
2007	0.115012015	172	0.6825325	0.7	0.36307
2007	0.942608416	172	0.6825325	0.7	0.36307
2007	0.125148762	172	0.6825325	0.7	0.36307
2007	0.022983334	172	0.6825325	0.7	0.36307
2007	0.080693861	172	0.6825325	0.7	0.36307
2008	0.056504407	198	0.7476	-1.4	0.6561
2008	0.028313724	198	0.7476	-1.4	0.6561
2008	0.2209923	198	0.7476	-1.4	0.6561
2008	0.40635	198	0.7476	-1.4	0.6561
2008	0.588218939	198	0.7476	-1.4	0.6561
2008	0.050318267	198	0.7476	-1.4	0.6561
2008	0.414530155	198	0.7476	-1.4	0.6561
2008	0.517796212	198	0.7476	-1.4	0.6561
2008	0.496176263	198	0.7476	-1.4	0.6561
2008	0.066082843	198	0.7476	-1.4	0.6561
2008	0.069682376	198	0.7476	-1.4	0.6561
2008	0.183946106	198	0.7476	-1.4	0.6561
2008	0.859964141	198	0.7476	-1.4	0.6561
2008	0.16851407	198	0.7476	-1.4	0.6561
2008	0.315426276	198	0.7476	-1.4	0.6561
2008	0.020194433	198	0.7476	-1.4	0.6561
2008	0.052805253	198	0.7476	-1.4	0.6561
2008	0.018495762	198	0.7476	-1.4	0.6561
2008	0.047562625	198	0.7476	-1.4	0.6561
2008	1.500241748	198	0.7476	-1.4	0.6561
2008	0.500167574	198	0.7476	-1.4	0.6561
2008	0.218058495	198	0.7476	-1.4	0.6561
2008	0.10748265	198	0.7476	-1.4	0.6561
2008	0.208373713	198	0.7476	-1.4	0.6561
2008	0.064923064	198	0.7476	-1.4	0.6561
2008	0.105186515	198	0.7476	-1.4	0.6561
2008	0.158549209	198	0.7476	-1.4	0.6561
2008	0.009678988	198	0.7476	-1.4	0.6561
2008	0.134343409	198	0.7476	-1.4	0.6561
2008	0.162924876	198	0.7476	-1.4	0.6561
2008	0.38900275	198	0.7476	-1.4	0.6561
2008	0.098035956	198	0.7476	-1.4	0.6561
2008	0.034665155	198	0.7476	-1.4	0.6561
2008	0.491251716	198	0.7476	-1.4	0.6561
2008	0.046261114	198	0.7476	-1.4	0.6561
2008	0.33710404	198	0.7476	-1.4	0.6561
2008	0.26880225	198	0.7476	-1.4	0.6561
2008	0.130964823	198	0.7476	-1.4	0.6561
2008	0.813201289	198	0.7476	-1.4	0.6561
2008	0.681512755	198	0.7476	-1.4	0.6561
2008	0.101135459	198	0.7476	-1.4	0.6561
2008	0.27961201	198	0.7476	-1.4	0.6561
2008	0.058085272	198	0.7476	-1.4	0.6561
2008	0.016653781	198	0.7476	-1.4	0.6561
2008	0.04954268	198	0.7476	-1.4	0.6561
2008	0.04781926	198	0.7476	-1.4	0.6561
2008	0.334095361	198	0.7476	-1.4	0.6561
2008	0.006660901	198	0.7476	-1.4	0.6561
2008	0.181601212	198	0.7476	-1.4	0.6561
2008	0.311594175	198	0.7476	-1.4	0.6561
2008	0.187836469	198	0.7476	-1.4	0.6561
2008	0.516531378	198	0.7476	-1.4	0.6561
2008	0.019639985	198	0.7476	-1.4	0.6561
2008	0.137456378	198	0.7476	-1.4	0.6561
2008	0.025382476	198	0.7476	-1.4	0.6561
2008	0.312468434	198	0.7476	-1.4	0.6561
2009	0.04286555	163	-0.7910025	-0.8	-0.0758352
2009	0.1615677	163	-0.7910025	-0.8	-0.0758352
2009	0.129290898	163	-0.7910025	-0.8	-0.0758352
2009	0.145791556	163	-0.7910025	-0.8	-0.0758352
2009	0.160386609	163	-0.7910025	-0.8	-0.0758352
2009	0.113512203	163	-0.7910025	-0.8	-0.0758352
2009	1.070226456	163	-0.7910025	-0.8	-0.0758352
2009	0.479039175	163	-0.7910025	-0.8	-0.0758352
2009	0.091217423	163	-0.7910025	-0.8	-0.0758352
2009	0.047915	163	-0.7910025	-0.8	-0.0758352
2009	0.133033085	163	-0.7910025	-0.8	-0.0758352
2009	1.457977806	163	-0.7910025	-0.8	-0.0758352
2009	0.031827673	163	-0.7910025	-0.8	-0.0758352
2009	0.600347165	163	-0.7910025	-0.8	-0.0758352
2009	0.42364949	163	-0.7910025	-0.8	-0.0758352
2009	0.701493408	163	-0.7910025	-0.8	-0.0758352
2009	0.173852379	163	-0.7910025	-0.8	-0.0758352
2009	0.126588193	163	-0.7910025	-0.8	-0.0758352
2009	0.170502353	163	-0.7910025	-0.8	-0.0758352
2009	0.11566227	163	-0.7910025	-0.8	-0.0758352
2009	0.08745176	163	-0.7910025	-0.8	-0.0758352
2009	0.224127	163	-0.7910025	-0.8	-0.0758352
2009	0.025085922	163	-0.7910025	-0.8	-0.0758352
2009	0.06533785	163	-0.7910025	-0.8	-0.0758352
2009	0.114306796	163	-0.7910025	-0.8	-0.0758352
2009	0.382604592	163	-0.7910025	-0.8	-0.0758352
2009	0.750299752	163	-0.7910025	-0.8	-0.0758352
2009	0.055875825	163	-0.7910025	-0.8	-0.0758352
2009	0.193918228	163	-0.7910025	-0.8	-0.0758352
2009	0.40240875	163	-0.7910025	-0.8	-0.0758352
2009	0.066671276	163	-0.7910025	-0.8	-0.0758352
2009	0.171251148	163	-0.7910025	-0.8	-0.0758352
2009	0.219500227	163	-0.7910025	-0.8	-0.0758352
2009	0.214253465	163	-0.7910025	-0.8	-0.0758352
2009	0.114812624	163	-0.7910025	-0.8	-0.0758352
2009	0.284705825	163	-0.7910025	-0.8	-0.0758352
2009	0.12528165	163	-0.7910025	-0.8	-0.0758352
2009	0.35197325	163	-0.7910025	-0.8	-0.0758352
2009	0.171408186	163	-0.7910025	-0.8	-0.0758352
2009	0.5422095	163	-0.7910025	-0.8	-0.0758352
2009	0.311122059	163	-0.7910025	-0.8	-0.0758352
2009	0.621354167	163	-0.7910025	-0.8	-0.0758352
2009	0.238324678	163	-0.7910025	-0.8	-0.0758352
2009	0.556328	163	-0.7910025	-0.8	-0.0758352
2009	0.0613042	163	-0.7910025	-0.8	-0.0758352
2009	0.347878608	163	-0.7910025	-0.8	-0.0758352
2009	0.171628025	163	-0.7910025	-0.8	-0.0758352
2009	0.194048155	163	-0.7910025	-0.8	-0.0758352
2009	0.291207071	163	-0.7910025	-0.8	-0.0758352
2009	0.042306818	163	-0.7910025	-0.8	-0.0758352
2009	0.400583168	163	-0.7910025	-0.8	-0.0758352
2010	0.026012277	228	-2.478895	1.3	-1.672933333
2010	0.263139951	228	-2.478895	1.3	-1.672933333
2010	2.056318	228	-2.478895	1.3	-1.672933333
2010	0.193614617	228	-2.478895	1.3	-1.672933333
2010	0.359686	228	-2.478895	1.3	-1.672933333
2010	0.265652475	228	-2.478895	1.3	-1.672933333
2010	0.874309536	228	-2.478895	1.3	-1.672933333
2010	0.18904085	228	-2.478895	1.3	-1.672933333
2010	0.30555	228	-2.478895	1.3	-1.672933333
2010	0.22213245	228	-2.478895	1.3	-1.672933333
2010	0.267270631	228	-2.478895	1.3	-1.672933333
2010	0.248320343	228	-2.478895	1.3	-1.672933333
2010	0.253583088	228	-2.478895	1.3	-1.672933333
2010	0.132609109	228	-2.478895	1.3	-1.672933333
2010	0.548039078	228	-2.478895	1.3	-1.672933333
2010	0.1260236	228	-2.478895	1.3	-1.672933333
2010	6.005322165	228	-2.478895	1.3	-1.672933333
2010	0.260931796	228	-2.478895	1.3	-1.672933333
2010	0.426806443	228	-2.478895	1.3	-1.672933333
2010	0.2997575	228	-2.478895	1.3	-1.672933333
2010	0.471680556	228	-2.478895	1.3	-1.672933333
2010	0.307660969	228	-2.478895	1.3	-1.672933333
2010	0.041898088	228	-2.478895	1.3	-1.672933333
2010	0.335572194	228	-2.478895	1.3	-1.672933333
2010	0.516561735	228	-2.478895	1.3	-1.672933333
2010	8.0101275	228	-2.478895	1.3	-1.672933333
2010	0.173767917	228	-2.478895	1.3	-1.672933333
2010	0.191857146	228	-2.478895	1.3	-1.672933333
2010	0.137985101	228	-2.478895	1.3	-1.672933333
2010	0.087753575	228	-2.478895	1.3	-1.672933333
2010	0.522313384	228	-2.478895	1.3	-1.672933333
2010	0.342531127	228	-2.478895	1.3	-1.672933333
2010	0.54793475	228	-2.478895	1.3	-1.672933333
2010	8.534031863	228	-2.478895	1.3	-1.672933333
2010	0.077131575	228	-2.478895	1.3	-1.672933333
2010	0.105611569	228	-2.478895	1.3	-1.672933333
2010	0.725659653	228	-2.478895	1.3	-1.672933333
2010	0.329829293	228	-2.478895	1.3	-1.672933333
2010	0.062313713	228	-2.478895	1.3	-1.672933333
2010	0.68067925	228	-2.478895	1.3	-1.672933333
2010	0.030297039	228	-2.478895	1.3	-1.672933333
2010	1.510788107	228	-2.478895	1.3	-1.672933333
2010	0.280565291	228	-2.478895	1.3	-1.672933333
2010	1.298043939	228	-2.478895	1.3	-1.672933333
2010	0.579632	228	-2.478895	1.3	-1.672933333
2010	0.297232108	228	-2.478895	1.3	-1.672933333
2011	0	186	0.8843	-1.3	-0.67427
2011	0.018053658	186	0.8843	-1.3	-0.67427
2011	0.475853283	186	0.8843	-1.3	-0.67427
2011	0.24510095	186	0.8843	-1.3	-0.67427
2011	0.052690485	186	0.8843	-1.3	-0.67427
2011	0.317519554	186	0.8843	-1.3	-0.67427
2011	0.296128922	186	0.8843	-1.3	-0.67427
2011	1.561678316	186	0.8843	-1.3	-0.67427
2011	2.386055583	186	0.8843	-1.3	-0.67427
2011	1.228162136	186	0.8843	-1.3	-0.67427
2011	0.317511869	186	0.8843	-1.3	-0.67427
2011	0.602381373	186	0.8843	-1.3	-0.67427
2011	0.251348529	186	0.8843	-1.3	-0.67427
2011	0.213506569	186	0.8843	-1.3	-0.67427
2011	0.148624444	186	0.8843	-1.3	-0.67427
2011	1.587869133	186	0.8843	-1.3	-0.67427
2011	0.075438409	186	0.8843	-1.3	-0.67427
2011	0.368090099	186	0.8843	-1.3	-0.67427
2011	0.496310309	186	0.8843	-1.3	-0.67427
2011	0.20188735	186	0.8843	-1.3	-0.67427
2011	0.349331818	186	0.8843	-1.3	-0.67427
2011	0.016046883	186	0.8843	-1.3	-0.67427
2011	0.3366155	186	0.8843	-1.3	-0.67427
2011	0.15062105	186	0.8843	-1.3	-0.67427
2011	0.384998454	186	0.8843	-1.3	-0.67427
2011	0.229292448	186	0.8843	-1.3	-0.67427
2011	2.53140534	186	0.8843	-1.3	-0.67427
2011	0.250238485	186	0.8843	-1.3	-0.67427
2011	0.188375944	186	0.8843	-1.3	-0.67427
2011	0.135374175	186	0.8843	-1.3	-0.67427
2012	0.22823049	189	-0.24187375	-0.7	1.371766667
2012	0.392175	189	-0.24187375	-0.7	1.371766667
2012	2.091309184	189	-0.24187375	-0.7	1.371766667
2012	0.299897194	189	-0.24187375	-0.7	1.371766667
2012	0.38603034	189	-0.24187375	-0.7	1.371766667
2012	0.080656917	189	-0.24187375	-0.7	1.371766667
2012	0.5045545	189	-0.24187375	-0.7	1.371766667
2012	0.779998454	189	-0.24187375	-0.7	1.371766667
2012	0.133278	189	-0.24187375	-0.7	1.371766667
2012	0.06763875	189	-0.24187375	-0.7	1.371766667
2012	0.208146075	189	-0.24187375	-0.7	1.371766667
2012	0.51386625	189	-0.24187375	-0.7	1.371766667
2012	0.471158929	189	-0.24187375	-0.7	1.371766667
2012	0.228565152	189	-0.24187375	-0.7	1.371766667
2012	0.23257665	189	-0.24187375	-0.7	1.371766667
2012	1.078616414	189	-0.24187375	-0.7	1.371766667
2012	0.171090631	189	-0.24187375	-0.7	1.371766667
2012	0.134890194	189	-0.24187375	-0.7	1.371766667
2012	0.153731845	189	-0.24187375	-0.7	1.371766667
2012	0.081978859	189	-0.24187375	-0.7	1.371766667
2012	0.19037654	189	-0.24187375	-0.7	1.371766667
2012	0.081344167	189	-0.24187375	-0.7	1.371766667
2012	0.333204293	189	-0.24187375	-0.7	1.371766667
2012	0.52835225	189	-0.24187375	-0.7	1.371766667
2012	0.882313119	189	-0.24187375	-0.7	1.371766667
2012	0.93039225	189	-0.24187375	-0.7	1.371766667
2012	0.287490594	189	-0.24187375	-0.7	1.371766667
